# Supplementary material for: HEPPA-II model-measurement intercomparison project: EPP indirect effects during the dynamically perturbed NH winter 2008–2009
Source: Copernicus journal article supplement (doi:10.5194/acp-2016-971), 2016-12-09
Supplement: Supplementary file [file acp-2016-971-AC1-supplement.pdf]

## **Responses to the comments of Referee #1**

*We thank Referee #1 for the thoughtful comments and suggestions, which certainly helped to improve the clarity of the manuscript. Please find below our detailed point-by-point reply to the comments, which we hope have addressed all satisfactorily.*

This paper is an important and substantive contribution that, subject to my comments below, certainly merits publication in ACP. Its conclusions are credible and will be valuable for modelers.

*Thank you very much!*

I do have lots of comments; their overall intent is to improve the paper and make it more useful to the community. An important editorial comment is that the paper is simply too long. There is a tradeoff that must be made between comprehensiveness and readability. These two parameters often anti-correlate. In this case, I believe the authors have leaned too far in the direction of comprehensiveness at the expense of readability. I also think there are some references that they should add- these are noted in the text below.

*Reply: See detailed responses below.*

For example, Section 2 is too long by probably a factor of two. These datasets are mostly all mature and have been used for this problem in the past. For example, we do not need to be reminded that (line 31 on page 8) that SABER temperatures require non-LTE calculations in the retrievals or the details of when SABER is yawed north or that SABER's duty cycle is still nearly 100% (line 24-25). Rather, there is a rich literature of observational studies of these elevated stratopause events that could and should easily substitute for much of the text in Section 2. For example, although the paragraph on MLS is not too long, I am quite surprised that none of Gloria Manney's work was cited- for instance, her 2009 ACP paper which used the MLS data for the 2006 event much in the same fashion as presently done. Similarly, is there any usage here of ACE-FTS data that differs significantly from Randall et al., GRL, 2009 (also missing from the reference list)? And given that the Funke et al., 2014 JGR papers are cited, the usage of the MIPAS data should just cite those works; again, it is not necessary to tell us how non-LTE vibrational distributions were modeled (line 25, page 7). Finally, there must be dozens of papers which discuss SABER temperatures; two that might be useful to cite here are Siskind et al., GRL, 2007 for the 2006 event and Yamashita et al, JGR, 2013 (see their Figure 7 which shows 4 winters compared with MERRA).

*Reply: We agree that Section 2 is rather long and can be shortened. In the revised version we will remove those details on the instruments and retrievals that are available elsewhere. However, we think that some details are relevant for this paper and should be maintained even if provided in previous work. This is the case for the information on sampling patterns and data gaps during the period of interest, as well as on accuracies and known biases.*

*We will further add the mentioned references for previous observational studies*

*about elevated stratopause events, based on the same instruments, in order to better put our work into the context of existing work. Note, however, that these studies employed different data versions compared to those used in the present work.*

A similar comment concerns the models, although the situation is not as bad and Table 1 is useful. Nonetheless,, given the recent detailed discussions of HAMMONIA by Meraner et al and the discussions of WACCM by Randall et al. (2015), they should probably cut back their descriptions. For example, the citation to Meraner et al is sufficient to discuss HAMMONIA's gravity waves; all the information presented here on the source spectrum etc is superfluous and detracts from readability.

*Reply: The model descriptions will be shortened (in particular, the information already listed in Table 1 will not be repeated again in the text). However, we think that detailed information on the non-orographic GW parameterizations should be maintained, as it is relevant for the paper and it helps to understand the individual model results.*

Other comments

1. I simply do not understand Figure 1. I don't see any symbol in Figure 1 which says "UBC". So how can the figure be showing it when none of the symbols do? What do the arrows show? I don't understand what the deviations are. Is this variance, standard deviation? What is the mathematic expression they are using? They should have two panels- one for absolute values, and one for whatever these deviations are. Then, the text needs to discuss this carefully, not simply with some parenthetical reference.

*Reply: We apologise that Figure 1 of the discussion paper is difficult to understand. The plot shows daily averaged NO<sub>x</sub> mixing ratios from satellite observations and those of the upper boundary condition sampled at the respective observations' time and location. We have improved both figure and caption for the revised version to make this clearer (see new figure below).*

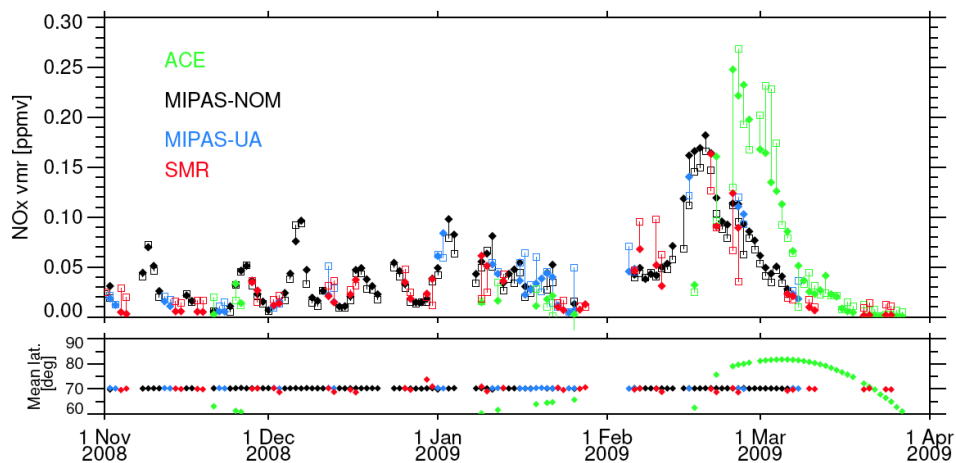

**Figure 1.** Upper panel: Daily averaged NO<sub>x</sub> mixing ratios from satellite observations (open squares) at 0.022 hPa within 60–90°N (black=MIPAS-NOM, blue = MIPAS-UA, red= SMR/Odin, green = ACE-FTS) and those of the upper boundary condition (filled diamonds) sampled at the respective observations' time and location. Lower panel: average latitude of observations. All averages are area-weighted.

2. Figure 3 should be deleted. It adds no new information that is not already clearly shown in Figure 2. I realize that the intent is to illustrate something about timing after the SSW- all I see is a jumble of points. Certainly the spread increases after Feb 1, but I cannot discern anything else.

*Reply: Figure 3 will be deleted in the revised version.*

3. One misunderstanding that I think I have concerns when exactly during the season does EPP-IE couple most strongly with the stratosphere? From reading Funke et al's two 2014 papers, it appears that significant NO<sub>x</sub> flux can penetrate into the stratosphere early in the winter, for example, November or December. Indeed in Funke et al., 2014, figure 10, one can see a tongue of EPP-NO<sub>y</sub> down dipping down to below 40 km on January 1st, much lower in altitude than the descending tongue in the post-SSW period. But in the present paper (page 30), it states that descending NO<sub>x</sub> can only be distinguished down to 0.3-0.5 hPa. This seems inconsistent and I think bears some explanation.

*Reply: The Funke et al. (2014) paper discusses EPP-NO<sub>y</sub> (the contribution of EPP-generated NO<sub>y</sub> to total NO<sub>y</sub>), while in the present study we analyse NO<sub>x</sub>. Since NO<sub>x</sub> is converted to other NO<sub>y</sub> species (HNO<sub>3</sub>) below approximately 45 km, the NO<sub>y</sub> descent below this altitude cannot be traced by NO<sub>x</sub>. Further, dilution of descending NO<sub>x</sub> with the stratospheric background masks the descent below 45 km in the present analysis, while this is not the case when looking at EPP-NO<sub>y</sub>. This will be mentioned in the revised version.*

Furthermore, if the pre-SSW NO<sub>x</sub> is more important for its contribution to the stratospheric NO<sub>x</sub> budget, then isn't the implication of the 2014 papers that the present focus on the post SSW descent is misplaced and of less relevance?

*Reply: The higher relevance of the pre-SSW NO<sub>x</sub> descent for the stratospheric NO<sub>y</sub> budget is particularly the reason why we included it in our analysis at a similar level of detail as the post-SSW descent, though larger deviations between models and observations in the latter case made it necessary to extend the discussion of post-SSW descent.*

4. Section 7.1: It would be useful to discuss and justify the selection of CO as a tracer more. While I realize this is popular because of the low stratospheric values (page 27, line 5), I think it should also be stated that CH<sub>4</sub> might be easier to simulate since it would not require the details of CO<sub>2</sub> dissociation or reaction with OH to be handled so carefully. Indeed the present author has used CH<sub>4</sub> (cf. his 2014 paper) as did Siskind in 2015 and Randall has used this for SH studies (her 2007 paper). Furthermore, with the selection of both CO and NO<sub>x</sub> we have two tracers that are being transported downgradient. Thus how can we know whether the transport we see is advective or diffusive? Is diffusion important in any of the simulations or in any of the model-model differences?

*Reply: Indeed we have analysed CH<sub>4</sub> in a similar manner as CO (see Figure below), however, we decided not to include these results in the paper for the following*

reasons:

- Modelled CH<sub>4</sub> distributions deviate larger from each other and from the observations than CO does, likely because of differences in the simulated chemical losses, as well as in the transport by the Brewer Dobson circulation. Despite of this, the evolution of CH<sub>4</sub> during the ES event behaves qualitatively similar (though with opposite vertical gradient) as CO such that not much new is learned.
- CH<sub>4</sub> concentrations drop rapidly towards higher altitudes such that observations are getting typically below the noise level above 0.1 hPa. The useful vertical range is thus much reduced compared to CO.
- The use of a second tracer that is being transported downgradient (in addition to NO<sub>x</sub>) is intentional. Since CO has no EPP source, it allows us to assess whether model biases are caused by deficiencies in the transport scheme or in the NO<sub>x</sub> production scheme (or UBC implementation, in the case of medium-top models).

Regarding the question whether diffusive or advective transport dominates, we would expect that in the case of a significant diffusive contribution the CO peak would be shifted slightly downwards while the CH<sub>4</sub> minimum would be shifted upwards. A qualitative comparison of the figure below and Figure 10 of the manuscript suggests that this is not the case, neither in the observations nor in the models.

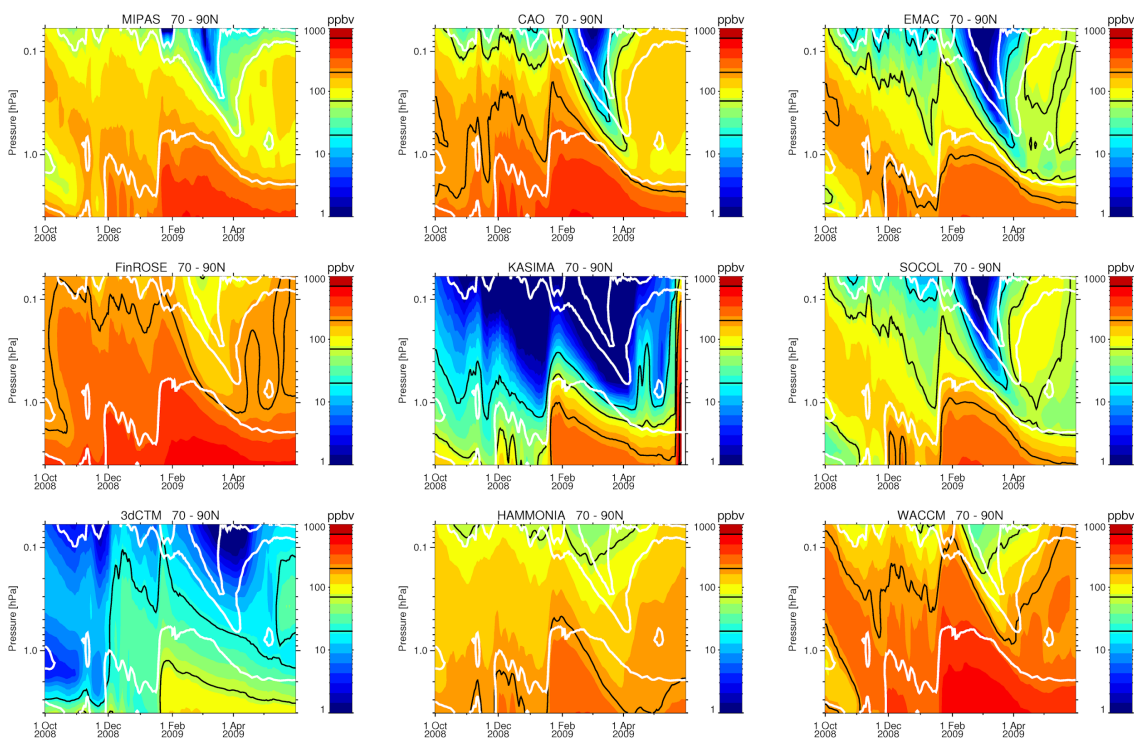

5. There is some discussion of the upper boundary that is used for the medium-top models. But the 2016 Funke paper states that one of its main objectives was to construct such a boundary. How do the values adopted here compare with what is presented in that paper?

*Reply: The UBC employed in the present study is based on the same MIPAS observations as used in Funke et al. (2016) for the construction of their semi-empirical model. Their Figure 8 already compares the semi-empirical UBC with the observed NO<sub>y</sub> (used here as UBC). The purpose of the semi-empirical model is to provide a NO<sub>y</sub> UBC for long-term climate simulations or for shorter simulations of periods not covered by MIPAS observations. Since this is not the case in the present study, we decided not to use the semi-empirical model but to rely on the observed NO<sub>x</sub>.*

6. Page 39: lines 12-13. I do not see where the consideration of the sampling patterns has been so important. Figure 19 shows that the temperatures are pretty similar. The only way this sentence can be justified if there were a figure which show a case where the sampling pattern was not considered vs. a case where it was. I don't think they've done this. It would not detract from any of their conclusions if this sentence were deleted.

*Reply: We do not fully agree, particularly with respect to the sampling impact on the NO<sub>x</sub> comparisons. In our opinion, there are significant differences, especially for the ACE sampling. For instance, we show the same model NO<sub>x</sub> sampled at different locations and times in Figure 2. Here, the ES-related tongue as observed by ACE has apparently a different timing compared to the other instruments. This is caused by the seasonal propagation of latitudes sounded by ACE (see also Fig.1, lower panel) and needs to be considered when comparing to other observations or models.*

#### Editorial comments

1. Line 18, on page 7 seems strange. "MIPAS passes the equator in a southerly direction at 10:00 AM. . . . .observing the atmosphere day and night". Presumably the nighttime data are acquired when MIPAS passes the equator in a northerly direction? This is all phrased more tersely and more clearly in their 2014 JGR paper.

*Reply: Following the major first comment above, this sentence will be removed.*

2. Page 25, line 1. The proper reference should be Siskind et al., JGR 2010 (not GRL, 2015), which discussed non-orographic drag in great depth. Likewise, consideration should be given to citing Chandran et al., GRL, 2011 who make this point as well.

*Reply: Both references will be cited adequately.*

3. Page 36, line 10, more grammar: Encountered is a verb and not an adjective and thus does not appear before the noun. It should read: "cold bias encountered at 1 hPa". Likewise page 38, line 3 "spread of the . . . . . encountered below 0.1 hPa". And again on page 40, line 3: ". . . encountered during the perturbed. . ." And finally on line 11, page 40.

*Reply: Thank you very much for the grammar's corrections. These sentences will be corrected.*
